# Supplementary material for: Promise of Risk Stratification for Multicancer Screening with Liquid Biopsy Tests
Source: Research Square preprint supplement (doi:10.21203/rs.3.rs-400074/v1), 2021-04-14
Supplement: Supplementary file 1 [file 57719f3c325ee5e043cadba3.docx]

**Supplementary Tables and Figures**

**Supplementary Figure S1. The estimated hazard ratios (HR) per standard deviation (SD) of polygenic risk score (PRS) by cancer type.** For each cancer type, Cox proportional hazard (Cox) model was fit to the female UK Biobank (UKBB) cohort (160,586 individuals) to evaluate the association between time to each cancer incidence and cancer specific PRS, adjusting for ten genetic principal components. Each model uses age as timescale. Individuals who were lost to follow-up, with genetic sex and self-reported sex mismatch, or those with prevalent cancers were excluded for the analysis. Each PRS is Z-score normalized to mean (μ) of 0 and standard deviation (σ) of 1. CI: Confidence Interval; HR: Hazard Ratio; SD: Standard Deviation; P: P-value; PRS: Polygenic Risk Score.

**Supplementary Figure S2. The estimated hazard ratios (HR) per standard deviation (SD) for each predictor included in the female multicancer Cox model, fitted to the training data.**

**Supplementary Figure S3.** **The estimated hazard ratios (HR) per standard deviation (SD) for each predictor included in the postmenopausal breast cancer Cox model, fitted to the training data.** PRS: Polygenic risk score; OCP: oral contraceptive use; HRT: Hormone replacement therapy; BMI: Body mass index

**Supplementary Figure S4.** **The estimated hazard ratios (HR) per standard deviation (SD) for each predictor included in the female colorectal cancer Cox model, fitted to the training data.** In females, colorectal cancer risk factors did not show significant association with colorectal cancer incidence. Therefore, only the colorectal cancer PRS is included in the model. PRS: Polygenic risk score.

**Supplementary Figure S5.** **The estimated hazard ratios (HR) per standard deviation (SD) for each predictor included in the female lung cancer Cox model, fitted to the training data.** PRS: Polygenic risk score

**Supplementary Figure S2-S5.** **The estimated hazard ratios (HR) per standard deviation (SD) for predictors included in each model.** Cox proportional hazard (Cox) model was fit to the UK Biobank (UKBB) training data. Each model uses age as timescale with individuals entering the model at age of recruitment and exiting at cancer incidence, death, or censoring age. The model is adjusted for first 10 genetic principal components. Each PRS is Z-score normalized to have a mean (μ) of 0 and standard deviation (σ) of 1. Self-reported family history of cancer breast, colorectal, lung, or prostate cancer in first-degree relatives (nonadopted father, mother, and siblings) is included in the model for S2. For S3-S5, self-reported family history of cancer of the corresponding cancer site in first-degree relatives is included in the model. BMI: Body mass Index; PRS: Polygenic Risk Score.

**Supplementary Figure S6. The projected NPV of the liquid biopsy test with 23.5% sensitivity at 98.9% specificity by age and cancer-specific risk score percentile.**

**Supplementary Table S1.** **Descriptive Statistics of the UK Biobank Study Population.**

**Supplementary Table S2.** **Source literature and summary statistics for the SNPs included in each cancer PRS.**

**Supplementary Table S3.** **Cancer types with the corresponding ICD-9 and ICD-10 codes, incident cancer cases, and the number of SNPs included in each cancer PRS.**

**Supplementary Table S4.** **Model performance of the pan-cancer risk score (PCRS) or cancer-specific risk scores in the test set.** PCRS/cancer-specific risk score is estimated as the weighted sum of the predictors included in each model. The weights are hazard ratios computed from fitting the Cox model to the training data. The performance of PCRS was evaluated in the test set. Hazard ratios (HR) per SD, the corresponding p-value, Harrell’s C-index, and area under the curve (AUC) is reported. Predictors included in each model is shown in Supplementary Figure S2-S5. AUC: area under the curve; CI: Confidence Interval; C-statistic: Harrell’s C-index; HR: Hazard Ratio; SD: Standard Deviation; P: p-value.

| Type of Alcohol | Alcohol by volume (ABV) | Volume (mL) |
| --- | --- | --- |
| Beer/cider | 5% | 1 pint = 568 mL |
| Red Wine | 13% | 1 glass = 125 mL |
| Champagne/White wine | 12% | 1 glass = 125 mL |
| Spirits | 40% | 1 spirit = 25 mL |
| Fortified Wine | 17.5% | 1 glass = 62.5 mL |
| Other alcoholic drinks (alcopops) | 5% | 1 glass = 125 mL |

**Supplementary Table S5. Categorization of self-reported alcohol intake.** UK Biobank provides average weekly alcohol intake by type of beverage. Based on this information, number of alcohol units are computed by multiplying Alcohol by Volume (ABV) by volume of the beverage and dividing it by 1000. Using this conversion and the alcohol frequency information, alcohol intake is grouped into four categories: never (0 units of alcohol per week), light (< 14 units of alcohol per week), moderate (Between 14 to 35 units of alcohol per week), and heavy (≥ 35 units of alcohol per week).

|  | All Cancers | Breast, Colorectum, Lung |
| --- | --- | --- |
| Stage I-IV Sensitivity at 98.9% Specificity | 27.1% | 23.5% |

**Supplementary Table S6. Reported performance of the DETECT-A blood test20.** For the multicancer model, the overall sensitivity (27.1%) of the DETECT-A blood test is used to compute positive predictive value (PPV) and negative predictive value (NPV). For cancers with standard of care screening (i.e. breast, colorectum, and lung), DETCT-A had a 3.6% lower sensitivity of 23.5% at 98.9% specificity. DETECT-A: Detecting cancers Earlier Through Elective mutation-based blood Collection and Testing.

**REFERENCES**

20. Jiang, T., Ren, S. & Zhou, C. Multi-cancer blood testing combined with PET-CT: road for hope to screen for cancer and guide intervention. *Signal Transduct. Target. Ther.* **5**, 95 (2020).
