# Supplementary material for: Promise of Risk Stratification for Multicancer Screening with Liquid Biopsy Tests
Source: Research Square preprint supplement (doi:10.21203/rs.3.rs-400074/v1), 2021-04-14
Supplement: Supplementary file 2 [file f9b9c25fcbbde2a28ac81418.xlsx]

## Sheet: Supplementary Table S1
Supplementary Table S1. Descriptive statistics of the UK Biobank study population
Female
Parameter	Groups	Number of Person-years (full female cohort)	Number of Incident Cancer Cases
Age at Study Entry	<44	98000	419
	45-49	148766	653
	50-54	177765	909
	55-59	205913	1402
	60-64	274936	2086
	65+	214753	1417
Body Mass Index	Normal (18.5 kg/m^2 - 24.9 kg/m^2)	440456	2377
	Underweight (< 18.5 kg/m^2)	8073	40
	Overweight (25 kg/m^2 - 29.9 kg/m^2)	413594	2651
	Obese (> 30 kg/m^2)	258011	1818
Family History of Cancer	Yes	844332	1973
	No	275802	4913
Smoking History	Never Smoker	675021	3850
	Former Smoker	350444	2341
	Current Smoker	94669.3	695
ᵃBreast, Colorectal, Lung, or Prostate Cancer in first-degree relatives (nonadopted father, mother, siblings)

## Sheet: Supplementary Table S2
Supplementary Table S2. Source literature and summary statistics for the SNPs used to build each cancer PRS
Source Literatures
Breast	Mavaddat, Nasim et al. “Polygenic Risk Scores for Prediction of Breast Cancer and Breast Cancer Subtypes.” American journal of human genetics vol. 104,1 (2019): 21-34. doi:10.1016/j.ajhg.2018.11.002
Colorectum	Huyghe, Jeroen R et al. “Discovery of common and rare genetic risk variants for colorectal cancer.” Nature genetics vol. 51,1 (2019): 76-87. doi:10.1038/s41588-018-0286-6
Endometrium	O'Mara, Tracy A et al. “Identification of nine new susceptibility loci for endometrial cancer.” Nature communications vol. 9,1 3166. 9 Aug. 2018, doi:10.1038/s41467-018-05427-7
Kidney	Scelo, Ghislaine et al. “Genome-wide association study identifies multiple risk loci for renal cell carcinoma.” Nature communications vol. 8 15724. 9 Jun. 2017, doi:10.1038/ncomms15724
Lung	McKay, James D et al. “Large-scale association analysis identifies new lung cancer susceptibility loci and heterogeneity in genetic susceptibility across histological subtypes.” Nature genetics vol. 49,7 (2017): 1126-1132. doi:10.1038/ng.3892
Melanoma	Landi, Maria Teresa et al. “Genome-wide association meta-analyses combining multiple risk phenotypes provide insights into the genetic architecture of cutaneous melanoma susceptibility.” Nature genetics vol. 52,5 (2020): 494-504. doi:10.1038/s41588-020-0611-8
Non-Hodgkin's Lymphoma (NHL)	Berndt, Sonja I et al. “Genome-wide association study identifies multiple risk loci for chronic lymphocytic leukemia.” Nature genetics vol. 45,8 (2013): 868-76. doi:10.1038/ng.2652
	Cerhan, James R et al. “Genome-wide association study identifies multiple susceptibility loci for diffuse large B cell lymphoma.” Nature genetics vol. 46,11 (2014): 1233-8. doi:10.1038/ng.3105
	Skibola, Christine F et al. “Genome-wide association study identifies five susceptibility loci for follicular lymphoma outside the HLA region.” American journal of human genetics vol. 95,4 (2014): 462-71. doi:10.1016/j.ajhg.2014.09.004
	Vijai, Joseph et al. “A genome-wide association study of marginal zone lymphoma shows association to the HLA region.” Nature communications vol. 6 5751. 8 Jan. 2015, doi:10.1038/ncomms6751
Ovary	Kuchenbaecker, Karoline B et al. “Identification of six new susceptibility loci for invasive epithelial ovarian cancer.” Nature genetics vol. 47,2 (2015): 164-71. doi:10.1038/ng.3185
	Phelan, Catherine M et al. “Identification of 12 new susceptibility loci for different histotypes of epithelial ovarian cancer.” Nature genetics vol. 49,5 (2017): 680-691. doi:10.1038/ng.3826
#	TYPE	RSID	CHR	BP	Effect Allele	Reference Allele	BETA/OR
1	breast	1_7917076_G_A	1	7917076	A	G	-0.0409
2	breast	1_10566215_A_G	1	10566215	G	A	-0.0586
3	breast	1_18807339_T_C	1	18807339	C	T	-0.0564
4	breast	1_41380440_C_T	1	41380440	T	C	0.0426
5	breast	1_41389220_T_C	1	41389220	C	T	0.155
6	breast	1_46670206_TC_T	1	46670206	T	TC	0.0447
7	breast	1_51467096_CT_C	1	51467096	C	CT	0.0374
8	breast	1_88156923_G_A	1	88156923	A	G	0.0494
9	breast	1_88428199_C_A	1	88428199	A	C	-0.0387
10	breast	1_100880328_A_T	1	100880328	T	A	0.0373
11	breast	1_110198129_CAAA_C	1	110198129	C	CAAA	0.0458
12	breast	1_114445880_G_A	1	114445880	A	G	0.0621
13	breast	1_118141492_A_C	1	118141492	C	A	0.0452
14	breast	1_120257110_T_C	1	120257110	C	T	0.0385
15	breast	1_121280613_A_G	1	121280613	G	A	0.0881
16	breast	1_121287994_A_G	1	121287994	G	A	-0.0673
17	breast	1_145604302_C_CT	1	145604302	CT	C	-0.0399
18	breast	1_149906413_T_C	1	149906413	C	T	0.0548
19	breast	1_155556971_G_A	1	155556971	A	G	0.0499
20	breast	1_168171052_CA_C	1	168171052	C	CA	-0.068
21	breast	1_172328767_T_TA	1	172328767	TA	T	-0.0435
22	breast	1_201437832_C_T	1	201437832	T	C	0.0917
23	breast	1_202184600_C_T	1	202184600	T	C	-0.0065
24	breast	1_203770448_T_A	1	203770448	A	T	0.0498
25	breast	1_204502514_T_TTCTGAAACAGGG	1	204502514	TTCTGAAACAGGG	T	-0.0321
26	breast	1_208076291_G_A	1	208076291	A	G	-0.0366
27	breast	1_217053815_T_G	1	217053815	G	T	0.0417
28	breast	1_217220574_G_A	1	217220574	A	G	-0.044
29	breast	1_220671050_C_T	1	220671050	T	C	0.0418
30	breast	1_242034263_A_G	1	242034263	G	A	0.1428
31	breast	2_10138983_T_C	2	10138983	C	T	0.0603
32	breast	2_19315675_T_A	2	19315675	A	T	-0.0331
33	breast	2_25129473_A_G	2	25129473	G	A	-0.0427
34	breast	2_29179452_G_C	2	29179452	C	G	-0.0066
35	breast	2_29615233_T_C	2	29615233	C	T	-0.0427
36	breast	2_39699510_C_CT	2	39699510	CT	C	-0.0402
37	breast	2_70172587_G_A	2	70172587	A	G	-0.0412
38	breast	2_88358825_G_C	2	88358825	C	G	0.0473
39	breast	2_121058254_A_G	2	121058254	G	A	-0.0334
40	breast	2_121089731_T_C	2	121089731	C	T	-0.0427
41	breast	2_121159205_G_A	2	121159205	A	G	-0.044
42	breast	2_121246568_T_C	2	121246568	C	T	0.0992
43	breast	2_172974566_C_G	2	172974566	G	C	-0.0473
44	breast	2_174212910_A_G	2	174212910	G	A	0.0593
45	breast	2_192381934_C_T	2	192381934	T	C	0.0316
46	breast	2_202204741_T_C	2	202204741	C	T	-0.0492
47	breast	2_217920769_G_T	2	217920769	T	G	-0.1318
48	breast	2_217955896_GA_G	2	217955896	G	GA	-0.2016
49	breast	2_218292158_C_G	2	218292158	G	C	-0.0757
50	breast	2_218714845_G_A	2	218714845	A	G	-0.0431
51	breast	2_241388857_C_A	2	241388857	A	C	-0.1232
52	breast	3_4742251_A_G	3	4742251	G	A	0.0616
53	breast	3_27353716_C_A	3	27353716	A	C	0.0748
54	breast	3_27388664_C_G	3	27388664	G	C	0.0502
55	breast	3_29294845_C_T	3	29294845	T	C	-0.1281
56	breast	3_30684907_C_T	3	30684907	T	C	0.0592
57	breast	3_46888198_T_C	3	46888198	C	T	-0.0806
58	breast	3_49709912_C_CT	3	49709912	CT	C	-0.0367
59	breast	3_55970777_A_AT	3	55970777	AT	A	-0.1195
60	breast	3_59373745_C_T	3	59373745	T	C	-0.0394
61	breast	3_71620370_T_G	3	71620370	G	T	-0.0374
62	breast	3_87037543_A_G	3	87037543	G	A	-0.0723
63	breast	3_99403877_G_A	3	99403877	A	G	-0.0376
64	breast	3_141112859_CTT_C	3	141112859	C	CTT	0.0551
65	breast	3_172285237_G_A	3	172285237	A	G	0.0422
66	breast	3_189774456_C_T	3	189774456	T	C	-0.0478
67	breast	4_38784633_G_T	4	38784633	T	G	0.0489
68	breast	4_89240476_G_A	4	89240476	A	G	0.0352
69	breast	4_92594859_TTCTTTC_T	4	92594859	T	TTCTTTC	-0.0407
70	breast	4_106069013_G_T	4	106069013	T	G	0.0471
71	breast	4_143467195_C_T	4	143467195	T	C	-0.0569
72	breast	4_151218296_CATATTT_C	4	151218296	C	CATATTT	0.0388
73	breast	4_175842495_G_A	4	175842495	A	G	-0.0898
74	breast	4_175847436_C_A	4	175847436	A	C	0.0348
75	breast	5_345109_T_C	5	345109	C	T	0.084
76	breast	5_1279790_C_T	5	1279790	T	C	0.0617
77	breast	5_1296255_A_AG	5	1296255	AG	A	-0.0549
78	breast	5_1353077_T_C	5	1353077	C	T	0.1552
79	breast	5_2777029_G_A	5	2777029	A	G	0.0391
80	breast	5_16231194_G_C	5	16231194	C	G	-0.0426
81	breast	5_32579616_TCA_T	5	32579616	T	TCA	0.0363
82	breast	5_44508264_G_GT	5	44508264	GT	G	-0.1177
83	breast	5_44619502_A_G	5	44619502	G	A	-0.1101
84	breast	5_44649944_C_T	5	44649944	T	C	0.0492
85	breast	5_44706498_A_G	5	44706498	G	A	0.0497
86	breast	5_44853593_G_C	5	44853593	C	G	-0.0336
87	breast	5_55662540_C_CT	5	55662540	CT	C	-0.0458
88	breast	5_55965167_C_T	5	55965167	T	C	0.0394
89	breast	5_56023083_T_G	5	56023083	G	T	0.1366
90	breast	5_56042972_C_T	5	56042972	T	C	0.0865
91	breast	5_56045081_T_C	5	56045081	C	T	-0.0564
92	breast	5_58241712_C_T	5	58241712	T	C	-0.0434
93	breast	5_71965007_G_A	5	71965007	A	G	-0.041
94	breast	5_73234583_T_C	5	73234583	C	T	-0.0363
95	breast	5_77155397_GT_G	5	77155397	G	GT	-0.0408
96	breast	5_79180995_G_GA	5	79180995	GA	G	0.0328
97	breast	5_81512947_TA_T	5	81512947	T	TA	-0.0598
98	breast	5_90789470_G_A	5	90789470	A	G	-0.0564
99	breast	5_104300273_G_T	5	104300273	T	G	-0.0487
100	breast	5_122478676_C_A	5	122478676	A	C	-0.0386
101	breast	5_122705244_C_T	5	122705244	T	C	0.0944
102	breast	5_131640536_A_G	5	131640536	G	A	0.0392
103	breast	5_132407058_C_T	5	132407058	T	C	-0.0388
104	breast	5_158244083_C_T	5	158244083	T	C	-0.0677
105	breast	5_169591460_T_C	5	169591460	C	T	0.0412
106	breast	5_173358154_G_A	5	173358154	A	G	0.0365
107	breast	5_176134882_T_C	5	176134882	C	T	0.0363
108	breast	6_13713366_G_C	6	13713366	C	G	-0.0553
109	breast	6_16399557_C_T	6	16399557	T	C	-0.0373
110	breast	6_18783140_G_A	6	18783140	A	G	0.0326
111	breast	6_20537845_CA_C	6	20537845	C	CA	-0.0391
112	breast	6_21923810_T_C	6	21923810	C	T	-0.0321
113	breast	6_27425644_G_C	6	27425644	C	G	-0.0737
114	breast	6_43227141_G_A	6	43227141	A	G	-0.064
115	breast	6_82263549_AAT_A	6	82263549	A	AAT	0.0477
116	breast	6_85912194_CAA_C	6	85912194	C	CAA	0.0762
117	breast	6_87803819_T_C	6	87803819	C	T	0.0383
118	breast	6_130341728_C_CT	6	130341728	CT	C	0.0472
119	breast	6_149595505_T_C	6	149595505	C	T	-0.0476
120	breast	6_151949806_A_C	6	151949806	C	A	0.0703
121	breast	6_151955914_A_G	6	151955914	G	A	0.1449
122	breast	6_152022664_CAAAAAAA_C	6	152022664	C	CAAAAAAA	0.0137
123	breast	6_152023191_G_A	6	152023191	A	G	0.0626
124	breast	6_152055978_A_T	6	152055978	T	A	0.074
125	breast	6_152432902_C_T	6	152432902	T	C	0.0649
126	breast	6_169006947_C_G	6	169006947	G	C	-0.0308
127	breast	6_170332621_T_C	6	170332621	C	T	0.0373
128	breast	7_21940960_A_G	7	21940960	G	A	-0.0467
129	breast	7_25569548_C_T	7	25569548	T	C	-0.0486
130	breast	7_28869017_G_A	7	28869017	A	G	-0.0572
131	breast	7_55192256_A_C	7	55192256	C	A	-0.0349
132	breast	7_94113799_T_C	7	94113799	C	T	0.0449
133	breast	7_98005235_G_A	7	98005235	A	G	-0.0467
134	breast	7_99948655_T_G	7	99948655	G	T	0.042
135	breast	7_101552440_G_A	7	101552440	A	G	-0.0568
136	breast	7_102481842_T_C	7	102481842	C	T	0.0418
137	breast	7_130656911_C_T	7	130656911	T	C	-0.0476
138	breast	7_130674481_G_A	7	130674481	A	G	0.0416
139	breast	7_139943702_CT_C	7	139943702	C	CT	0.0582
140	breast	7_144048902_G_T	7	144048902	T	G	-0.0563
141	breast	8_170692_T_C	8	170692	C	T	0.0477
142	breast	8_17787610_CT_C	8	17787610	C	CT	-0.0377
143	breast	8_23447496_A_G	8	23447496	G	A	-0.0389
144	breast	8_23663653_C_A	8	23663653	A	C	0.0335
145	breast	8_29509616_A_C	8	29509616	C	A	-0.0601
146	breast	8_36858483_A_G	8	36858483	G	A	-0.076
147	breast	8_76230943_A_G	8	76230943	G	A	0.0755
148	breast	8_76333056_C_T	8	76333056	T	C	0.1129
149	breast	8_76378165_G_T	8	76378165	T	G	-0.0391
150	breast	8_102483100_T_C	8	102483100	C	T	0.0593
151	breast	8_106358620_A_T	8	106358620	T	A	-0.0745
152	breast	8_117209548_A_G	8	117209548	G	A	-0.0417
153	breast	8_120862186_A_G	8	120862186	G	A	0.0527
154	breast	8_124563705_T_C	8	124563705	C	T	0.0477
155	breast	8_124571581_G_A	8	124571581	A	G	0.034
156	breast	8_124739913_T_G	8	124739913	G	T	0.0466
157	breast	8_128213561_C_CA	8	128213561	CA	C	-0.043
158	breast	8_128370949_C_G	8	128370949	G	C	0.0642
159	breast	8_128372172_A_G	8	128372172	G	A	0.0597
160	breast	8_129199566_G_A	8	129199566	A	G	0.0615
161	breast	8_143669254_A_G	8	143669254	G	A	-0.0346
162	breast	9_6880263_A_G	9	6880263	G	A	0.0348
163	breast	9_21964882_CAAAA_C	9	21964882	C	CAAAA	0.055
164	breast	9_22041998_C_G	9	22041998	G	C	0.0289
165	breast	9_36928288_T_C	9	36928288	C	T	0.0249
166	breast	9_87782211_T_C	9	87782211	C	T	0.0361
167	breast	9_98362587_T_C	9	98362587	C	T	0.0576
168	breast	9_110303808_TAA_T	9	110303808	T	TAA	0.0797
169	breast	9_110837073_A_G	9	110837073	G	A	0.1158
170	breast	9_110837176_C_T	9	110837176	T	C	0.0653
171	breast	9_110849525_G_T	9	110849525	T	G	0.0153
172	breast	9_110885479_C_T	9	110885479	T	C	0.0877
173	breast	9_119313486_A_G	9	119313486	G	A	-0.0462
174	breast	9_129424719_A_G	9	129424719	G	A	-0.0382
175	breast	9_136146597_C_T	9	136146597	T	C	0.04
176	breast	10_5794652_A_G	10	5794652	G	A	0.047
177	breast	10_13892298_G_A	10	13892298	A	G	0.0371
178	breast	10_22032942_A_G	10	22032942	G	A	-0.058
179	breast	10_22477776_ACC_A	10	22477776	A	ACC	0.1687
180	breast	10_22861490_A_C	10	22861490	C	A	0.0875
181	breast	10_38523626_C_A	10	38523626	A	C	0.0404
182	breast	10_64299890_A_G	10	64299890	G	A	-0.1345
183	breast	10_64819996_G_T	10	64819996	T	G	0.0472
184	breast	10_71335574_C_T	10	71335574	T	C	-0.0404
185	breast	10_80851257_G_T	10	80851257	T	G	-0.0805
186	breast	10_80886726_A_G	10	80886726	G	A	0.0762
187	breast	10_95292187_CAA_C	10	95292187	C	CAA	-0.0512
188	breast	10_114777670_C_T	10	114777670	T	C	0.0472
189	breast	10_115128491_T_C	10	115128491	C	T	-0.0592
190	breast	10_123095209_G_A	10	123095209	A	G	-0.0538
191	breast	10_123340107_A_G	10	123340107	G	A	0.1508
192	breast	10_123340431_GC_G	10	123340431	G	GC	-0.2408
193	breast	10_123349324_A_T	10	123349324	T	A	-0.2609
194	breast	11_433617_T_C	11	433617	C	T	-0.0437
195	breast	11_803017_A_G	11	803017	G	A	0.0457
196	breast	11_1895708_C_A	11	1895708	A	C	-0.0762
197	breast	11_18664241_T_G	11	18664241	G	T	0.0461
198	breast	11_42844441_C_T	11	42844441	T	C	-0.0336
199	breast	11_44368892_G_A	11	44368892	A	G	0.0374
200	breast	11_46318032_C_G	11	46318032	G	C	-0.0748
201	breast	11_65553492_C_A	11	65553492	A	C	0.0425
202	breast	11_65572431_G_A	11	65572431	A	G	-0.0347
203	breast	11_69328130_A_T	11	69328130	T	A	-0.0423
204	breast	11_69330983_G_A	11	69330983	A	G	0.1022
205	breast	11_69331418_C_T	11	69331418	T	C	0.1782
206	breast	11_103614438_T_G	11	103614438	G	T	0.0147
207	breast	11_108267402_C_CA	11	108267402	CA	C	-0.0022
208	breast	11_111696440_T_C	11	111696440	C	T	-0.0396
209	breast	11_116727936_A_T	11	116727936	T	A	-0.0423
210	breast	11_122966626_A_G	11	122966626	G	A	-0.0383
211	breast	11_129243417_T_G	11	129243417	G	T	-0.0543
212	breast	11_129461016_A_G	11	129461016	G	A	0.0453
213	breast	12_293626_A_G	12	293626	G	A	0.0401
214	breast	12_14413931_G_C	12	14413931	C	G	0.0484
215	breast	12_28149568_C_T	12	28149568	T	C	-0.062
216	breast	12_28174817_C_T	12	28174817	T	C	-0.0856
217	breast	12_28347382_C_T	12	28347382	T	C	-0.0521
218	breast	12_29140260_G_A	12	29140260	A	G	0.0647
219	breast	12_57146069_T_G	12	57146069	G	T	-0.0579
220	breast	12_70798355_A_T	12	70798355	T	A	0.0469
221	breast	12_83064195_G_GA	12	83064195	GA	G	0.0671
222	breast	12_85004551_C_T	12	85004551	T	C	0.0348
223	breast	12_96027759_A_G	12	96027759	G	A	-0.0867
224	breast	12_103097887_C_T	12	103097887	T	C	0.0546
225	breast	12_111600134_G_T	12	111600134	T	G	-0.0442
226	breast	12_115108136_T_C	12	115108136	C	T	0.0465
227	breast	12_115796577_A_G	12	115796577	G	A	-0.0428
228	breast	12_115835836_T_C	12	115835836	C	T	-0.0813
229	breast	12_120832146_C_T	12	120832146	T	C	0.0516
230	breast	13_32839990_G_A	13	32839990	A	G	0.0424
231	breast	13_32972626_A_T	13	32972626	T	A	0.2687
232	breast	13_43501356_A_G	13	43501356	G	A	0.0517
233	breast	13_73806982_T_C	13	73806982	C	T	0.0345
234	breast	13_73960952_A_G	13	73960952	G	A	0.0399
235	breast	14_37128564_C_A	14	37128564	A	C	-0.0733
236	breast	14_37228504_C_T	14	37228504	T	C	0.039
237	breast	14_68660428_T_C	14	68660428	C	T	-0.0474
238	breast	14_68979835_T_C	14	68979835	C	T	-0.0911
239	breast	14_91751788_TC_T	14	91751788	T	TC	0.038
240	breast	14_91841069_A_G	14	91841069	G	A	0.0513
241	breast	14_93070286_C_T	14	93070286	T	C	-0.0577
242	breast	14_105213978_T_G	14	105213978	G	T	0.0399
243	breast	15_46680811_C_A	15	46680811	A	C	-0.1973
244	breast	15_50694306_A_G	15	50694306	G	A	-0.0417
245	breast	15_66630569_G_A	15	66630569	A	G	-0.0369
246	breast	15_67457698_A_G	15	67457698	G	A	0.0782
247	breast	15_75750383_T_C	15	75750383	C	T	-0.0413
248	breast	15_91512267_G_T	15	91512267	T	G	-0.0589
249	breast	15_100905819_A_C	15	100905819	C	A	-0.0608
250	breast	16_4008542_CAAAAA_C	16	4008542	C	CAAAAA	-0.0329
251	breast	16_4106788_C_A	16	4106788	A	C	-0.03
252	breast	16_6963972_C_G	16	6963972	G	C	0.0354
253	breast	16_10706580_G_A	16	10706580	A	G	-0.074
254	breast	16_23007047_G_T	16	23007047	T	G	0.1218
255	breast	16_52538825_C_A	16	52538825	A	C	0.1147
256	breast	16_52599188_C_T	16	52599188	T	C	0.107
257	breast	16_53809123_C_T	16	53809123	T	C	-0.0704
258	breast	16_53861139_C_T	16	53861139	T	C	-0.0338
259	breast	16_53861592_G_A	16	53861592	A	G	-0.0337
260	breast	16_54682064_G_A	16	54682064	A	G	0.0477
261	breast	16_80648296_A_G	16	80648296	G	A	0.0839
262	breast	16_85145977_T_C	16	85145977	C	T	-0.0211
263	breast	16_87086492_T_C	16	87086492	C	T	-0.0469
264	breast	17_29168077_G_T	17	29168077	T	G	-0.0568
265	breast	17_39251123_T_C	17	39251123	C	T	0.0799
266	breast	17_40127060_T_C	17	40127060	C	T	0.0174
267	breast	17_40485239_G_T	17	40485239	T	G	-0.0571
268	breast	17_40744470_G_A	17	40744470	A	G	0.2017
269	breast	17_43212339_C_CT	17	43212339	CT	C	0.0438
270	breast	17_44283858_G_A	17	44283858	A	G	-0.054
271	breast	17_53209774_A_C	17	53209774	C	A	-0.0793
272	breast	17_77781725_A_G	17	77781725	G	A	-0.0401
273	breast	18_11696613_C_T	18	11696613	T	C	-0.0381
274	breast	18_20634253_C_T	18	20634253	T	C	-0.0415
275	breast	18_24125857_T_C	18	24125857	C	T	0.0346
276	breast	18_24337424_C_G	18	24337424	G	C	0.0455
277	breast	18_24518050_AT_A	18	24518050	A	AT	-0.0599
278	breast	18_25407513_C_G	18	25407513	G	C	0.0399
279	breast	18_29981526_G_A	18	29981526	A	G	-0.1058
280	breast	18_42411803_G_C	18	42411803	C	G	-0.0877
281	breast	18_42888797_T_C	18	42888797	C	T	-0.0542
282	breast	19_13249921_G_T	19	13249921	T	G	0.0956
283	breast	19_17393925_C_A	19	17393925	A	C	0.0378
284	breast	19_18569492_C_T	19	18569492	T	C	-0.0719
285	breast	19_19517054_C_CGGGCG	19	19517054	CGGGCG	C	0.0437
286	breast	19_44283031_T_C	19	44283031	C	T	0.0619
287	breast	19_46166073_T_C	19	46166073	C	T	-0.036
288	breast	19_55816678_C_T	19	55816678	T	C	-0.0359
289	breast	20_5948227_G_A	20	5948227	A	G	0.076
290	breast	20_11379842_T_C	20	11379842	C	T	0.0844
291	breast	20_41613706_C_G	20	41613706	G	C	0.0315
292	breast	20_52296849_G_A	20	52296849	A	G	0.044
293	breast	21_16364756_T_G	21	16364756	G	T	0.0646
294	breast	21_16566350_A_G	21	16566350	G	A	0.0595
295	breast	21_16574455_C_A	21	16574455	A	C	-0.0707
296	breast	21_47762932_G_A	21	47762932	A	G	0.0946
297	breast	22_19766137_C_T	22	19766137	T	C	-0.0367
298	breast	22_29121087_A_G	22	29121087	G	A	0.1839
299	breast	22_29135543_G_A	22	29135543	A	G	0.0654
300	breast	22_29203724_C_T	22	29203724	T	C	0.1405
301	breast	22_29551872_A_G	22	29551872	G	A	-0.1716
302	breast	22_39343916_T_A	22	39343916	A	T	0.0407
303	breast	22_40904707_CT_C	22	40904707	C	CT	0.1148
304	breast	22_43433100_C_T	22	43433100	T	C	-0.06
305	breast	22_45319953_G_A	22	45319953	A	G	-0.0134
306	breast	22_46283297_G_A	22	46283297	A	G	0.0736
1	colorectum	rs12144319	1	55246035	C	T	1.07
2	colorectum	rs17011141	1	222112634	G	A	1.09
3	colorectum	rs6678517	1	183002639	A	G	1.08
4	colorectum	rs3731861	2	219191256	T	C	1.06
5	colorectum	rs448513	2	159964552	C	T	1.05
6	colorectum	rs983402	2	199781586	T	C	1.07
7	colorectum	rs10049390	3	133701119	A	G	1.06
8	colorectum	rs35470271	3	40915239	G	A	1.1
9	colorectum	rs72942485	3	112999560	G	A	1.19
10	colorectum	rs11727676	4	145659064	C	T	1.09
11	colorectum	rs13149359	4	94938618	A	C	1.05
12	colorectum	rs1391441	4	106128760	A	G	1.05
13	colorectum	rs12514517	5	40280076	A	G	1.1
14	colorectum	rs2735940	5	1296486	G	A	1.09
15	colorectum	rs4976270	5	134467220	C	T	1.07
16	colorectum	rs16878812	6	35569562	A	G	1.08
17	colorectum	rs62404966	6	55712124	C	T	1.06
18	colorectum	rs9271695	6	32593080	G	A	1.09
19	colorectum	rs12672022	7	45136423	T	C	1.07
20	colorectum	rs16892766	8	117630683	C	A	1.2
21	colorectum	rs3133285	8	117629411	G	C	1.07
22	colorectum	rs6983267	8	128413305	G	T	1.16
23	colorectum	rs10980628	9	113671403	C	T	1.07
24	colorectum	rs1537372	9	22103183	G	T	1.05
25	colorectum	rs34405347	9	101679752	T	G	1.09
26	colorectum	rs10821907	10	52648454	C	T	1.08
27	colorectum	rs11190164	10	101351704	G	A	1.08
28	colorectum	rs11255841	10	8739580	T	A	1.09
29	colorectum	rs12246635	10	114288619	C	T	1.1
30	colorectum	rs704017	10	80819132	G	A	1.08
31	colorectum	rs174533	11	61549025	G	A	1.07
32	colorectum	rs3087967	11	111156836	T	C	1.12
33	colorectum	rs7121958	11	74280012	G	T	1.08
34	colorectum	rs11610543	12	43134191	G	A	1.05
35	colorectum	rs12372718	12	51171090	G	A	1.09
36	colorectum	rs2250430	12	6421174	T	A	1.07
37	colorectum	rs3217810	12	4388271	T	C	1.13
38	colorectum	rs35808169	12	4368607	C	T	1.08
39	colorectum	rs4759277	12	57533690	A	C	1.05
40	colorectum	rs597808	12	111973358	G	A	1.08
41	colorectum	rs7300312	12	115890922	C	T	1.07
42	colorectum	rs7333607	13	37462010	G	A	1.08
43	colorectum	rs78341008	13	73791554	C	T	1.12
44	colorectum	rs8000189	13	111075881	T	C	1.06
45	colorectum	rs17094983	14	59189361	G	A	1.09
46	colorectum	rs35107139	14	54419106	C	A	1.09
47	colorectum	rs7160450	14	54457231	T	C	1.06
48	colorectum	rs16969681	15	32993111	T	C	1.11
49	colorectum	rs56324967	15	67402824	C	T	1.07
50	colorectum	rs58658771	15	33001734	A	T	1.15
51	colorectum	rs12149163	16	86339315	T	C	1.05
52	colorectum	rs9924886	16	68743939	A	C	1.06
53	colorectum	rs9930005	16	80043258	C	A	1.05
54	colorectum	rs1078643	17	10707241	A	G	1.08
55	colorectum	rs4968127	17	809643	G	A	1.07
56	colorectum	rs75954926	17	81061048	G	A	1.09
57	colorectum	rs983318	17	70413253	A	G	1.06
58	colorectum	rs28840750	19	33519927	T	G	1.21
59	colorectum	rs34797592	19	16417198	T	C	1.09
60	colorectum	rs73068325	19	59079096	T	C	1.07
61	colorectum	rs11087784	20	7740976	G	A	1.09
62	colorectum	rs1741640	20	60932414	C	T	1.12
63	colorectum	rs189583	20	6376457	G	C	1.1
64	colorectum	rs4813802	20	6699595	G	T	1.07
65	colorectum	rs6031311	20	42666475	T	C	1.06
66	colorectum	rs6063514	20	49055318	C	T	1.07
67	colorectum	rs6066825	20	47340117	A	G	1.07
1	endometrium	rs113998067	1	37607755	C	T	1.23
2	endometrium	rs148261157	2	60670444	A	G	1.26
3	endometrium	rs1740828	6	21648854	G	A	1.15
4	endometrium	rs2747716	6	125687226	A	G	1.1
5	endometrium	rs139584729	8	128611656	C	G	1.39
6	endometrium	rs4733613	8	128587032	C	G	1.17
7	endometrium	rs1679014	9	22207038	T	C	1.18
8	endometrium	rs10835920	11	32468118	T	C	1.09
9	endometrium	rs10850382	12	114776743	T	C	1.1
10	endometrium	rs3184504	12	111446804	C	T	1.1
11	endometrium	rs9668337	12	26273405	A	G	1.11
12	endometrium	rs7981863	13	73238004	C	T	1.16
13	endometrium	rs17601876	15	51261712	G	A	1.12
14	endometrium	rs937213	15	40029923	C	T	1.09
15	endometrium	rs11263761	17	37737784	A	G	1.15
16	endometrium	rs882380	17	48216874	A	C	1.1
1	kidney	rs10936602	3	169536637	C	T	0.9
2	kidney	rs11813268	10	105682296	T	C	1.12
3	kidney	rs11894252	2	46306237	T	C	1.16
4	kidney	rs12105918	2	144450626	C	T	1.25
5	kidney	rs2241261	8	22876739	T	C	1.1
6	kidney	rs4381241	1	50907438	C	T	1.11
7	kidney	rs4765623	12	124836304	T	C	1.14
8	kidney	rs4903064	14	73279420	C	T	1.21
9	kidney	rs67311347	3	40533243	A	G	0.9
10	kidney	rs7105934	11	69424973	A	G	0.7
11	kidney	rs718314	12	26300350	G	A	1.18
12	kidney	rs74911261	11	108357137	A	G	1.41
1	lung	rs71658797	1	77967507	A	T	1.13629
2	lung	rs112401627	5	1300269	A	G	1.30408
3	lung	rs2735947	5	1299392	A	G	0.885399
4	lung	rs2853668	5	1300025	T	G	1.08043
5	lung	rs380286	5	1320247	A	G	0.86824
6	lung	rs40183	5	1348352	A	G	0.882075
7	lung	rs56345976	5	1276873	G	A	1.09733
8	lung	rs7705526	5	1285974	A	C	1.12426
9	lung	rs116629156	6	30864829	C	T	1.07077
10	lung	rs116080888	6	32586236	A	C	0.917814
11	lung	rs115915654	6	30769726	T	C	1.08156
12	lung	rs13191445	6	26015489	A	G	1.14964
13	lung	rs149442300	6	29791256	T	C	1.07444
14	lung	rs74942078	6	32605884	T	C	1.16909
15	lung	rs239935	6	167411788	G	A	1.06913
16	lung	rs116822326	6	31434111	G	A	1.15018
17	lung	rs3130975	6	31081838	T	C	1.08053
18	lung	rs114279165	6	31425499	G	A	1.08113
19	lung	rs115870917	6	29607101	C	T	1.19799
20	lung	rs34661125	6	28281894	A	G	1.15972
21	lung	rs115444303	6	29942983	G	A	1.07437
22	lung	rs114103504	6	31002452	G	A	0.932219
23	lung	rs3999544	6	26285867	C	T	1.0788
24	lung	rs56114371	6	27274834	T	C	1.14321
25	lung	rs6912292	6	26511805	C	A	0.923506
26	lung	rs116383790	6	31628733	T	C	1.06853
27	lung	rs114229481	6	32743640	A	G	1.07319
28	lung	rs11780471	8	27344719	A	G	0.86837
29	lung	rs1629083	11	118126576	C	T	1.06931
30	lung	rs7953330	12	998819	C	G	0.916433
31	lung	rs11571833	13	32972626	T	A	1.6035
32	lung	rs117189732	15	79083280	T	C	1.16939
33	lung	rs12443170	15	78907736	A	G	0.797416
34	lung	rs151118057	15	78988620	A	G	0.74537
35	lung	rs2229961	15	78880752	A	G	1.43148
36	lung	rs28580532	15	79134724	T	C	1.10294
37	lung	rs55781567	15	78857986	G	C	1.29742
38	lung	rs66759488	15	47577451	A	G	1.07027
39	lung	rs7177201	15	79065380	T	C	0.883548
40	lung	rs76474922	15	78884553	C	A	0.798685
41	lung	rs77468143	15	49376624	G	T	0.920661
42	lung	rs8192479	15	78909398	T	C	1.28141
43	lung	rs56113850	19	41353107	T	C	0.884447
1	melanoma	rs2369633	1	205181062	T	C	1.0951
2	melanoma	rs2695237	1	226603635	T	C	1.0947
3	melanoma	rs670318	1	63727542	T	C	0.8646
4	melanoma	rs76798800	1	154994978	G	T	0.9174
5	melanoma	rs8444	1	150938571	G	A	1.0801
6	melanoma	rs10931936	2	202143928	T	C	1.0774
7	melanoma	rs12473635	2	25778637	T	C	0.9332
8	melanoma	rs1800440	2	38298139	T	C	1.1018
9	melanoma	rs3950296	3	169493283	C	G	1.0775
10	melanoma	rs12523094	5	90262612	T	C	1.0714
11	melanoma	rs13178866	5	1323212	C	T	0.8753
12	melanoma	rs16891982	5	33951693	C	G	0.4834
13	melanoma	rs2853667	5	1300070	A	G	1.0623
14	melanoma	rs32578	5	149211868	G	A	1.0903
15	melanoma	rs7705526	5	1285974	C	A	0.9187
16	melanoma	rs12215602	6	1145265	G	A	0.9414
17	melanoma	rs6908626	6	91005743	G	T	1.0861
18	melanoma	rs6914598	6	21163919	T	C	0.9117
19	melanoma	rs72834823	6	22719379	T	A	1.0972
20	melanoma	rs117132860	7	17134708	G	A	0.7114
21	melanoma	rs12539524	7	22115454	C	T	0.9264
22	melanoma	rs4731207	7	124396645	G	A	0.9265
23	melanoma	rs73069846	7	16996528	C	T	0.9457
24	melanoma	rs7778378	7	130738666	C	T	0.9336
25	melanoma	rs13263376	8	72864240	G	A	0.9311
26	melanoma	rs6994183	8	21951009	A	T	0.9222
27	melanoma	rs10739220	9	109054417	C	T	1.1036
28	melanoma	rs10960710	9	12587153	G	T	0.9322
29	melanoma	rs1339759	9	110711586	C	G	1.0946
30	melanoma	rs2027939	9	21956492	G	A	1.09
31	melanoma	rs3217986	9	22005330	T	G	0.8532
32	melanoma	rs3780269	9	134457580	G	A	0.9443
33	melanoma	rs55797833	9	21995044	T	G	1.5024
34	melanoma	rs75883022	9	22067910	C	T	0.7927
35	melanoma	rs79356439	9	22011360	A	G	1.8504
36	melanoma	rs871024	9	21803880	C	A	1.1782
37	melanoma	rs7902587	10	105694301	C	T	0.8563
38	melanoma	rs1126809	11	89017961	G	A	0.8325
39	melanoma	rs12290699	11	120195702	T	C	0.9379
40	melanoma	rs1801516	11	108175462	G	A	1.1426
41	melanoma	rs4354713	11	69380898	A	G	1.0969
42	melanoma	rs7941496	11	16041305	G	T	1.0602
43	melanoma	rs1056927	12	13070752	A	G	0.9267
44	melanoma	rs10859996	12	96378807	C	T	1.0662
45	melanoma	rs113469387	12	116580291	G	A	0.9111
46	melanoma	rs4237963	12	17275460	T	A	0.9276
47	melanoma	rs1278768	13	113535949	G	C	0.9358
48	melanoma	rs117648907	15	33277710	C	T	0.8039
49	melanoma	rs1805007	16	89986117	C	T	0.6145
50	melanoma	rs1805008	16	89986144	C	T	0.7307
51	melanoma	rs1805009	16	89986546	G	C	0.6777
52	melanoma	rs2967383	16	82217153	G	T	1.0649
53	melanoma	rs3212371	16	89987201	A	G	0.9186
54	melanoma	rs4420522	16	68822971	A	G	0.9259
55	melanoma	rs1641548	17	7574779	C	T	1.0812
56	melanoma	rs78378222	17	7571752	T	G	0.7568
57	melanoma	rs12984831	19	3540539	G	C	0.6531
58	melanoma	rs143190905	20	62291767	G	T	1.1454
59	melanoma	rs6059655	20	32665748	A	G	1.4117
60	melanoma	rs408825	21	42743496	C	T	0.8889
61	melanoma	rs132941	22	38545942	T	C	1.0995
62	melanoma	rs5766565	22	45622684	A	G	1.0632
63	melanoma	rs79966207	22	50722408	T	C	0.9238
1	nhl	rs13401811	2	111332575	G	A	1.41
2	nhl	rs3769825	2	201819625	T	C	1.19
3	nhl	rs3770745	2	37449593	T	C	1.24
4	nhl	rs79480871	2	24694472	T	C	1.34
5	nhl	rs6444305	3	188299902	G	A	1.21
6	nhl	rs898518	4	109236273	A	C	1.2
7	nhl	rs116446171	6	484453	G	C	2.2
8	nhl	rs12195582	6	32444544	T	C	1.78
9	nhl	rs2922994	6	31335901	G	A	1.64
10	nhl	rs9461741	6	32370587	C	G	2.66
11	nhl	rs13255292	8	129076573	T	C	1.22
12	nhl	rs4733601	8	129269466	A	G	1.18
13	nhl	rs1679013	9	22196987	C	T	1.19
14	nhl	rs4406737	10	90749704	G	A	1.27
15	nhl	rs4937362	11	128492739	T	C	1.19
16	nhl	rs4938573	11	118741842	C	T	1.34
17	nhl	rs7944004	11	2267728	T	G	1.2
18	nhl	rs4368253	18	55773267	C	T	1.19
19	nhl	rs4987852	18	58944901	G	A	1.41
20	nhl	rs4987855	18	58944529	G	A	1.47
1	ovary	rs56318008	1	22470407	T	C	1.11
2	ovary	rs58722170	1	38096421	C	G	1.1
3	ovary	rs2165109	2	111818658	C	A	1.09
4	ovary	rs711830	2	177037311	A	G	1.11
5	ovary	rs752590	2	113972945	G	A	1.3
6	ovary	rs62274041	3	156435640	A	G	1.45
7	ovary	rs9870207	3	190525516	A	G	1.19
8	ovary	rs13113999	4	167187046	T	G	1.23
9	ovary	rs17329882	4	119949960	C	A	1.09
10	ovary	rs7705526	5	1285974	A	C	1.09
11	ovary	rs116133110	6	28480635	C	T	0.93
12	ovary	rs1400482	8	129541931	G	A	1.18
13	ovary	rs150293538	8	77320354	C	T	2.19
14	ovary	8:82668818	8	82668818	G	A	1.16
15	ovary	rs9886651	8	128817883	G	A	1.08
16	ovary	rs10962692	9	16915874	G	C	1.24
17	ovary	rs320203	9	104943226	C	A	1.29
18	ovary	rs635634	9	136155000	T	C	1.11
19	ovary	rs7902587	10	105694301	T	C	1.29
20	ovary	rs7953249	12	121403724	G	A	1.08
21	ovary	rs1879586	17	43567337	G	C	1.13
22	ovary	rs7207826	17	46500673	C	T	1.11
23	ovary	rs7405776	17	36093022	A	G	1.1
24	ovary	rs8098244	18	21405553	A	G	1.19
25	ovary	rs6005807	22	28934313	C	T	1.17

## Sheet: Supplementary Table S3
Supplementary Table S3. Cancer types with the corresponding ICD-9 and ICD-10 codes, incident cancer cases, and the number of SNPs included in each cancer PRS.
Cancer Type	ICD-10 Code	ICD-9 Code	Incident Cancer Cases (Female)	Number of SNPs included in each PRS
Breast	C50	174	3570	306
Colorectum	C18-C20	153, 154	836	67
Endometrium	C54,C55	179, 182	563	16
Kidney	C64	189	153	12
Lung	C33-C34	162	577	43
Malignant Melanoma	C43	172	513	63
Non-Hodgkin Lymphoma (Chronic Lymphocytic Leukemia/Small lymphocytic lymphoma, Diffuse Large B-Cell Lymphoma, Follicular Lymphoma, and Marginal Zone Lymphoma)	C82, C83.0, C83.3, C83.8, C85.2, C88.4	200.3, 200.5, 200.7, 200.8, 202	328	20
Ovary	C56	183	346	25
Total			6886

## Sheet: Supplementary Table S4
Supplementary Table S4. Model performance of the pan-cancer risk scores (PCRS)/cancer-specific risk scores in the test set.
Female
Multicancer Model n= 53529, number of events= 2295
aPRSbladder + … + PRSpancreas + bRisk Factors
HR per SD (95% CI)	P	5 Year AUC	C-Statistics (SE)
1.40 (1.35 - 1.46)	7.57417e-64	0.61	0.60 (0.006)
bRisk Factors Only
HR per SD (95% CI)	P	5 Year AUC	C-Statistics (SE)
1.18 (1.14 - 1.22)	1.5001e-18	0.54	0.55 (0.006)
aPRSbladder + … + PRSpancreas
HR per SD (95% CI)	P	5 Year AUC	C-Statistics (SE)
1.35 (1.30 - 1.41)	2.586e-47	0.59	0.59 (0.006)
Breast Cancer (Post-Menopause) n= 32464, number of events= 757
PRSBreast + cRisk Factors
HR per SD (95% CI)	P	5 Year AUC	C-Statistics (SE)
1.69 (1.58 - 1.82)	9.84296e-49	0.65	0.65 (0.01)
cRisk Factors Only
HR per SD (95% CI)	P	5 Year AUC	C-Statistics (SE)
1.27 (1.19 - 1.36)	1.0851e-11	0.561136	0.57 (0.01)
PRSBreast
HR per SD (95% CI)	P	5 Year AUC	C-Statistics (SE)
1.61 (1.50 - 1.73)	6.6774e-40	0.65	0.64 (0.01)
Colorectal Cancer n= 53529, number of events= 279
PRScolorectum + dRisk Factors
HR per SD (95% CI)	P	5 Year AUC	C-Statistics (SE)
1.56 (1.38 - 1.76)	6.1e-13	0.62	0.64 (0.02)
dRisk Factors Only
HR per SD (95% CI)	P	5 Year AUC	C-Statistics (SE)
1.06 (0.93 - 1.20)	0.411	0.52	0.56 (0.02)
PRScolorectum
HR per SD (95% CI)	P	5 Year AUC	C-Statistics (SE)
1.56 (1.39 - 1.76)	7.1e-14	0.62	0.64 (0.02)
Lung Cancer n= 53529, number of events= 192
PRSLung + eRisk Factors
HR per SD (95% CI)	P	5 Year AUC	C-Statistics (SE)
2.38 (2.16 - 2.63)	3.45045e-67	0.818552	0.78 (0.02)
eRisk Factors Only
HR per SD (95% CI)	P	5 Year AUC	C-Statistics (SE)
1.67 (1.55 - 1.79)	7.16224e-47	0.795298	0.76 (0.02)
PRSLung Only
HR per SD (95% CI)	P	5 Year AUC	C-Statistics (SE)
1.21 (1.06 - 1.38)	0.00482269	0.58	0.62 (0.02)
aBladder, breast, colorectum, endometrium, kidney, lung, melanoma, non-Hodgkin's lymphoma (NHL), ovary, pancreas PRS
bBody mass index (BMI) smoking status, pack years of smoking, family history of breast, colorectum, lung, and prostate cancer in first-degree relative (nonadopted father, mother, and siblings)
cAge at first live birth, parity, age at menarche, age at menopause, oral contraceptive use, hormone replacement therapy use, alcohol intake, BMI, family history of breast cancer, standing height, smoking history
dAlcohol intake, BMI, number of days of physical activity, family history of colorectal cancer, smoking status, pack years of smoking
ePersonal history of lung disease, family history of lung cancer, smoking status, pack years of smoking
